# Supplementary material for: Multicolor emission of nonaromatic linear polysiloxanes based on local conjugation chains
Source: Royal Society of Chemistry journal article supplement (doi:10.1039/d2py01083f), 2022-01-01
Supplement: d2py01083f1.pdf [file d2py01083f1.pdf]

Supporting Information for

**Multicolor emission of nonaromatic linear polysiloxane based on local conjugation chains**

Yanyun He, Fan Ding, Yan Zhao, Wei Tian, Weixu Feng \* and Hongxia Yan \*

*Key Laboratory of Special Functional and Smart Polymer Materials of Ministry of Industry and Information Technology, Shaanxi Key Laboratory of Macromolecular Science and Technology, School of Chemistry and Chemical Engineering, Northwestern Polytechnical University, Xi'an, Shaanxi, 710129, PR China*

| Content                                                                                                                                                                                                                                                                                            | Page |
|----------------------------------------------------------------------------------------------------------------------------------------------------------------------------------------------------------------------------------------------------------------------------------------------------|------|
| Fig. S1. FTIR spectra of LPSi-2, malonic acid, and M2.....                                                                                                                                                                                                                                         | S3   |
| Fig. S2. FTIR spectra of distillate of LPSi and standard ethanol.....                                                                                                                                                                                                                              | S3   |
| Fig. S3. <sup>1</sup> H NMR spectra of LPSi-2, malonic acid and M2.....                                                                                                                                                                                                                            | S3   |
| Fig. S4. <sup>13</sup> C NMR spectra of LPSi-2, malonic acid and M2.....                                                                                                                                                                                                                           | S4   |
| Fig. S5. GPC curve of LPSi-1 (a) and LPSi-2 (b).....                                                                                                                                                                                                                                               | S4   |
| Table S1 GPC data of LPSi-1 and LPSi-2.....                                                                                                                                                                                                                                                        | S4   |
| Fig. S6. (a) UV-vis absorption spectra and (b) PL spectra of LPSi-2 in the ethanol solution at different concentrations, (c) Theoretical UV-vis spectra for LPSi-1 and LPSi-2 with a degree of polymerization of 3.....                                                                            | S5   |
| Fig. S7. Absolute quantum yield and fluorescence attenuation curve for the pure LPSi-1 (a, b) and LPSi-2 (c, d).....                                                                                                                                                                               | S5   |
| Fig. S8. CIE coordinates of LPSi-1 (a) and LPSi-2 (b) in ethanol solution.....                                                                                                                                                                                                                     | S6   |
| Table S2. The CIE coordinates of LPSi-1 ethanol solution were calculated according to the emission wavelength at different excitation wavelengths.....                                                                                                                                             | S6   |
| Fig. S9. (a) Excitation-dependent photoluminescence of the pure LPSi-1 at varying excitation wavelengths (The inset shows normalized emission); (b) CIE coordinates of pure LPSi-1.....                                                                                                            | S7   |
| Table S3. The CIE coordinates of pure LPSi-1 were calculated according to the emission wavelength at different excitation wavelengths.....                                                                                                                                                         | S7   |
| Fig. S10. Optimized conformations of aggregation molecules increases from 1 to 4 of LPSi-1 with a degree of polymerization of 1 (a~d).....                                                                                                                                                         | S8   |
| Fig. S11. Optimized conformations of aggregation molecules increases from 1 to 4 of LPSi-2 with a degree of polymerization of 1 (a~d).....                                                                                                                                                         | S8   |
| Table S4. DFT calculation results of LPSi-1 molecules with polymerization degree 1.....                                                                                                                                                                                                            | S9   |
| Table S5. TD-DFT calculation results of oscillator strengths for the LPSi-1 and LPSi-2 with a degree of polymerization of 3.....                                                                                                                                                                   | S9   |
| Fig. S12. (a) Synthesis route of linear polysiloxane, (b) Fluorescence microscopy images of pure P2 under the light filter of UV-2A (Ex 330–380 nm), BV-2A (Ex 400–440 nm), B-2A (Ex 450–490 nm), and G-2A (Ex 510–560 nm); (c) Optimized conformations of four first generation P2 molecules..... | S9   |
| Fig. S13. TEM micrographs of self-assembled morphology of LPSi-1 and LPSi-2 in ethanol with the concentration at 10 mg/mL (a, c) and 50 mg/mL (b, d), respectively.....                                                                                                                            | S10  |
| Fig. S14. Particle size distribution of LPSi-1 (a) and LPSi-2 (b) ethanol solutions at different concentrations.....                                                                                                                                                                               | S10  |

Fig. S15. (a) Metal ion sensitivity of LPSi-1; (b) effect of the concentration of Fe<sup>3+</sup> on fluorescence intensity of LPSi-1. S11

Fig. S16. (a) Metal ion sensitivity of LPSi-2; (b) solvent sensitivity of LPSi-2.; (c) pH sensitivity of LPSi-2. ....S11

Fig. S17 The particle size distribution of LPSi-1 and LPSi-2 in different solvents. ....S12

References .....S12

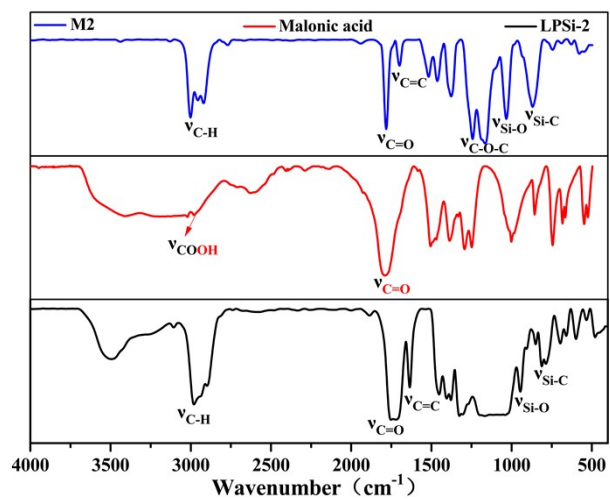

Fig. S1. FTIR spectra of LPSi-2, malonic acid, and M2.

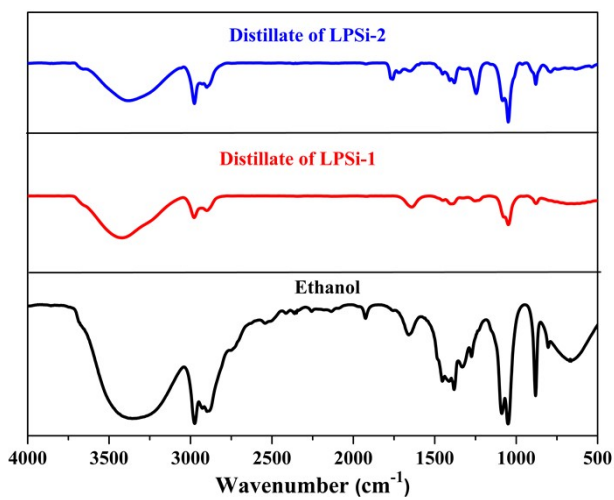

Fig. S2. FTIR spectra of distillate of LPSi and standard ethanol.

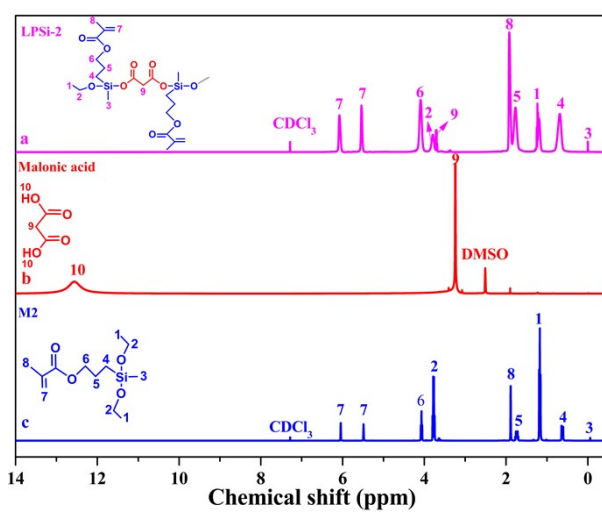

Fig. S3. <sup>1</sup>H NMR spectra of LPSi-2, malonic acid and M2.

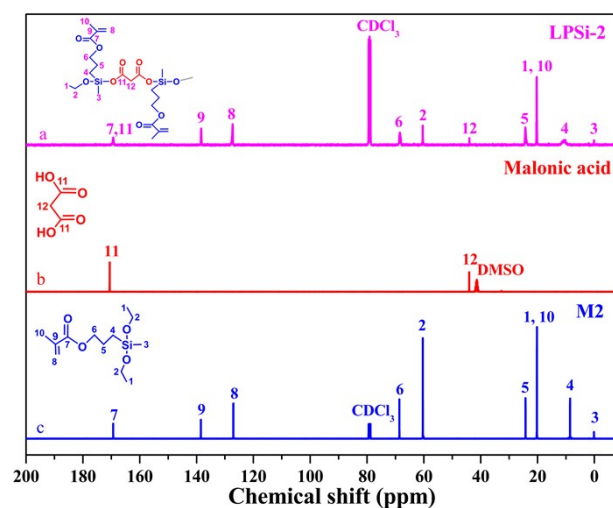

Fig. S4.  $^{13}\text{C}$  NMR spectra of LPSi-2, malonic acid and M2.

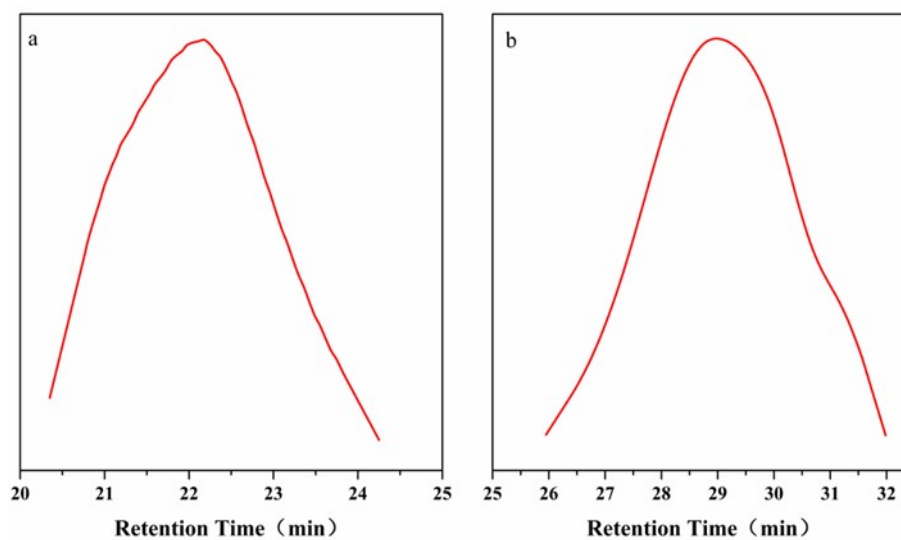

Fig. S5. GPC curve of LPSi-1 (a) and LPSi-2 (b).

Table S1 GPC data of LPSi-1 and LPSi-2.

| Polymer | $M_n$ | $M_w$ | $M_z$ | $M_{z+1}$ | PDI  |
|---------|-------|-------|-------|-----------|------|
| LPSi-1  | 60200 | 70800 | 81800 | 92200     | 1.18 |
| LPSi-2  | 6300  | 6800  | 8500  | 7600      | 1.26 |

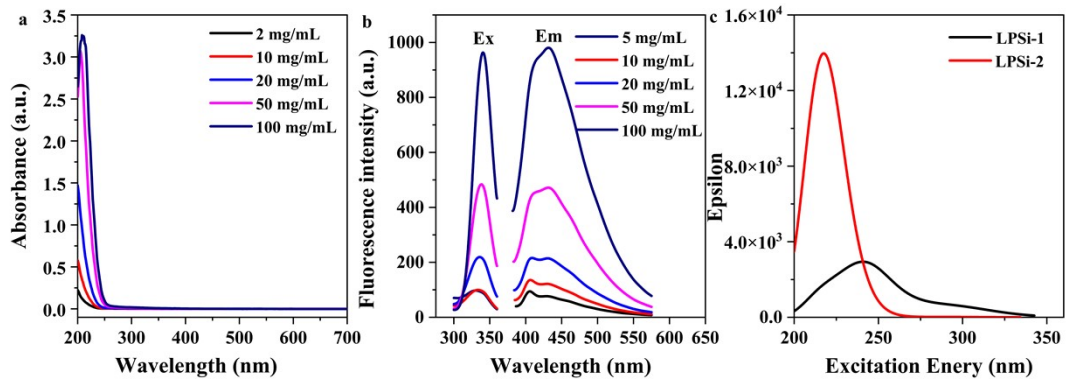

**Fig. S6.** (a) UV-vis absorption spectra and (b) PL spectra of LPSi-2 in the ethanol solution at different concentrations, (c) Theoretical UV-vis spectra for LPSi-1 and LPSi-2 with a degree of polymerization of 3.

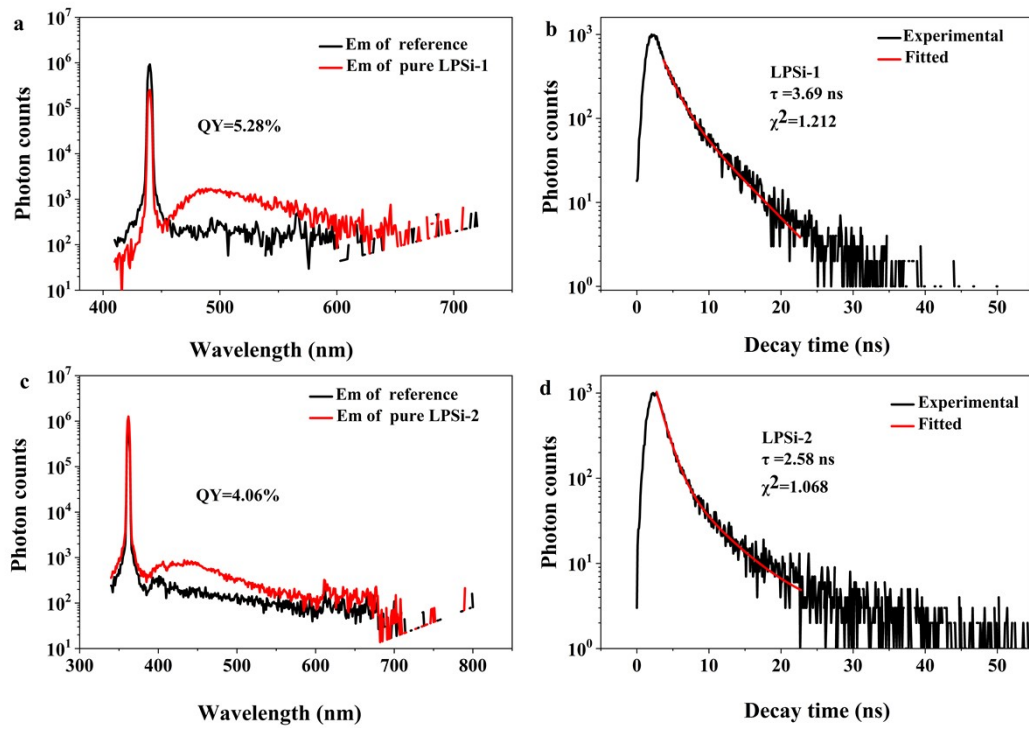

**Fig. S7.** Absolute quantum yield and fluorescence attenuation curve for the pure LPSi-1 (a, b) and LPSi-2 (c, d).

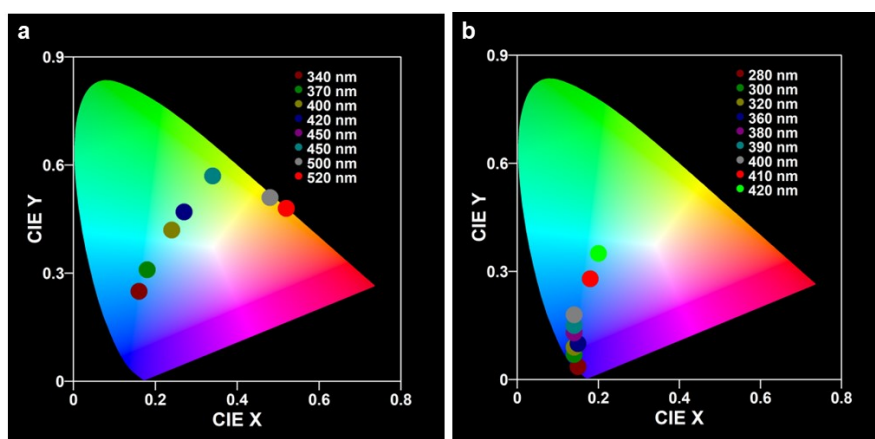

**Fig. S8.** CIE coordinates of LPSi-1 (a) and LPSi-2 (b) in ethanol solution.

**Table S2** The CIE coordinates of LPSi-1 ethanol solution were calculated according to the emission wavelength at different excitation wavelengths.

| Polymer | Excitation | CIE coordinates |
|---------|------------|-----------------|
| LPSi-1  | 340 nm     | (0.16, 0.25)    |
|         | 370 nm     | (0.18, 0.31)    |
|         | 400 nm     | (0.24, 0.42)    |
|         | 420 nm     | (0.27, 0.47)    |
|         | 450 nm     | (0.34, 0.57)    |
|         | 470 nm     | (0.39, 0.58)    |
|         | 500 nm     | (0.48, 0.51)    |
|         | 520 nm     | (0.52, 0.48)    |
| LPSi-2  | 320 nm     | (0.14, 0.09)    |
|         | 340 nm     | (0.15, 0.09)    |
|         | 360 nm     | (0.15, 0.10)    |
|         | 380 nm     | (0.14, 0.13)    |
|         | 400 nm     | (0.14, 0.18)    |
|         | 410 nm     | (0.18, 0.28)    |
|         | 420 nm     | (0.20, 0.35)    |

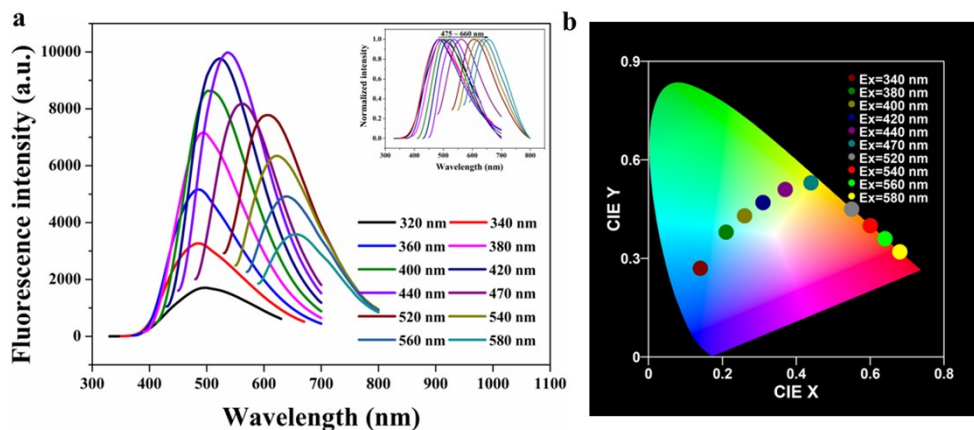

**Fig. S9.** (a) Excitation-dependent photoluminescence of the pure LPSi-1 at varying excitation wavelengths (The inset shows normalized emission); (b) CIE coordinates of pure LPSi-1.

**Table S3** The CIE coordinates of pure LPSi-1 were calculated according to the emission wavelength at different excitation wavelengths.

| Polymer | Excitation   | CIE coordinates |
|---------|--------------|-----------------|
| LPSi-1  | 340 nm       | (0.14, 0.27)    |
|         | 380 nm       | (0.21, 0.38)    |
|         | 400 nm       | (0.26, 0.43)    |
|         | 420 nm       | (0.31, 0.47)    |
|         | 440 nm       | (0.37, 0.51)    |
|         | 470 nm       | (0.44, 0.53)    |
|         | 520 nm       | (0.55, 0.45)    |
|         | 540 nm       | (0.60, 0.40)    |
|         | 560 nm       | (0.64, 0.36)    |
| 580 nm  | (0.68, 0.32) |                 |

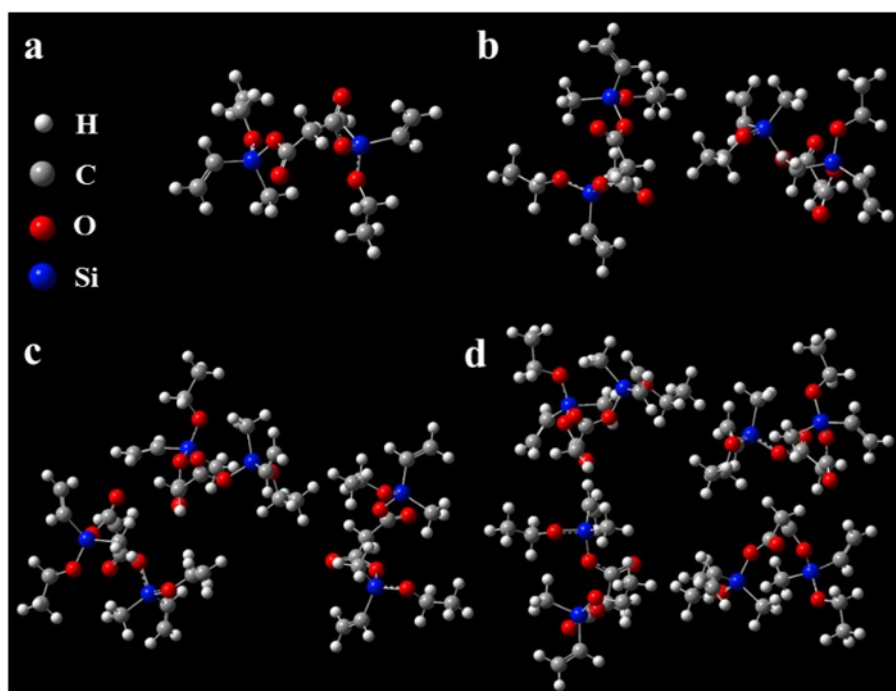

**Fig. S10.** Optimized conformations of aggregation molecules increases from 1 to 4 of LPSi-1 with a degree of polymerization of 1 (a~d).

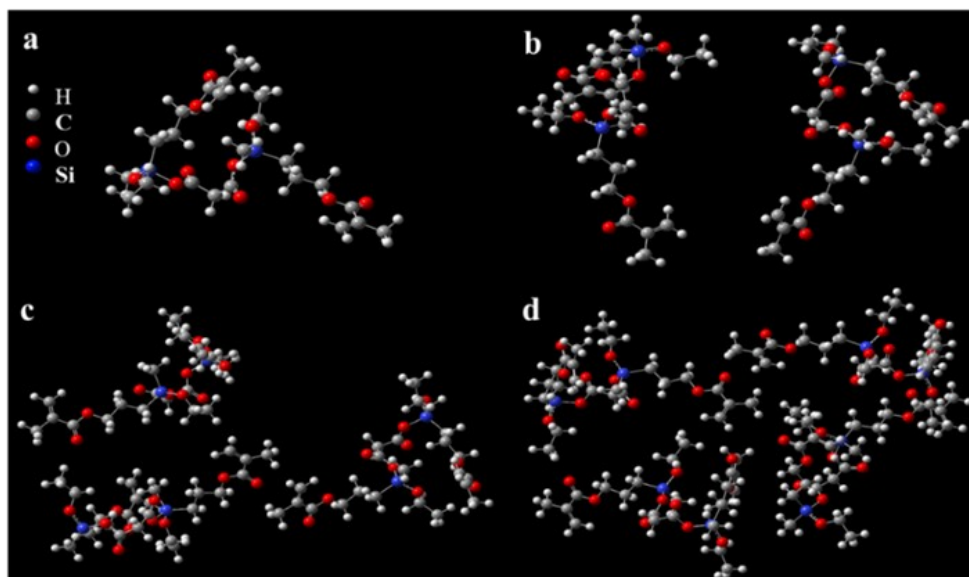

**Fig. S11.** Optimized conformations of aggregation molecules increases from 1 to 4 of LPSi-2 with a degree of polymerization of 1 (a~d).



**Table S4** DFT calculation results of LPSi-1 molecules with polymerization degree 1.

| Molecule number | E(HOMO) a.u | E(LUMO) a.u. | Energy gap/a.u. | Energy gap/eV |
|-----------------|-------------|--------------|-----------------|---------------|
| 1               | -0.264      | -0.015       | 0.249           | 6.764         |
| 2               | -0.263      | -0.017       | 0.246           | 6.695         |
| 3               | -0.260      | -0.017       | 0.243           | 6.604         |
| 4               | -0.260      | -0.019       | 0.241           | 6.564         |

**Tab. S5.** TD-DFT calculation results of oscillator strengths for the LPSi-1 and LPSi-2 with a degree of polymerization of 3.

| Oligomer               | LPSi-1 | LPSi-2 |
|------------------------|--------|--------|
| Excitation energy (nm) | 249.17 | 229.86 |
| Oscillator strengths   | 0.0133 | 0.0108 |

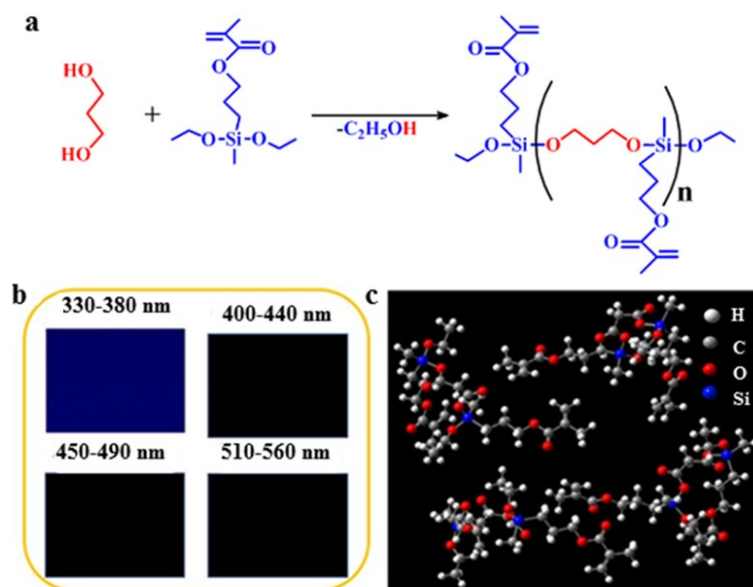

**Fig. S12.** (a) Synthesis route of linear polysiloxane, (b) Fluorescence microscopy images of pure P2 under the light filter of UV-2A (Ex 330–380 nm), BV-2A (Ex 400–440 nm), B-2A (Ex 450–490 nm), and G-2A (Ex 510–560 nm); (c) Optimized conformations of four first generation P2 molecules.<sup>1</sup>

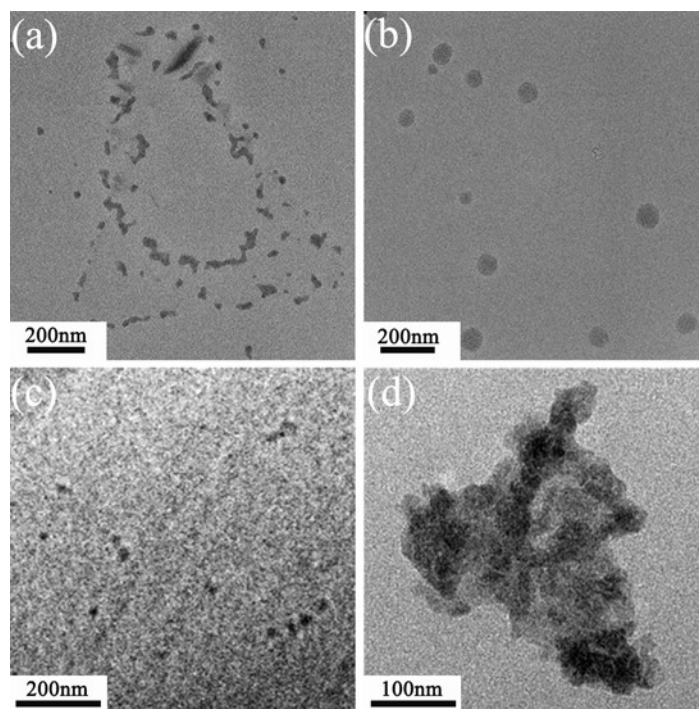

**Fig. S13.** TEM micrographs of self-assembled morphology of LPSi-1 and LPSi-2 in ethanol with the concentration at 10 mg/mL (a, c) and 50 mg/mL (b, d), respectively.

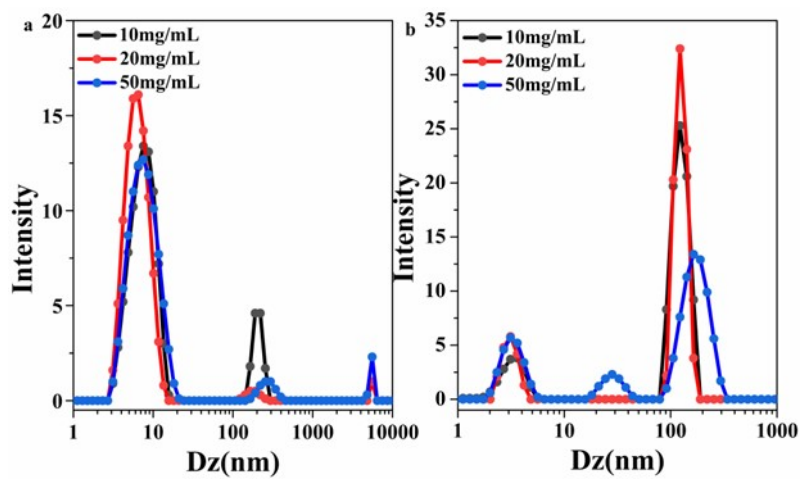

**Fig. S14.** Particle size distribution of LPSi-1 (a) and LPSi-2 (b) ethanol solutions at different concentrations.

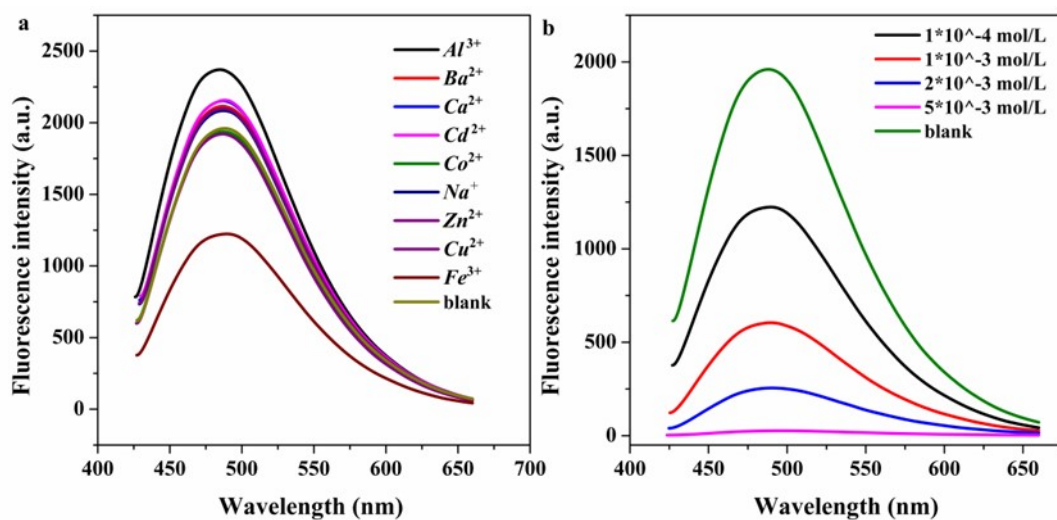

**Fig. S15.** Metal ion sensitivity (a) and effect of the concentration of  $\text{Fe}^{3+}$  on fluorescence intensity (b) of LPSi-1 at 20 mg/mL ethanol solution.

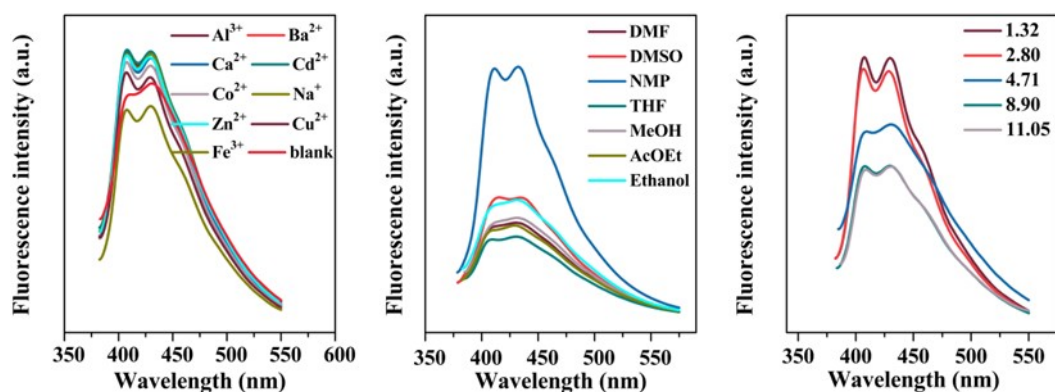

**Fig. S16.** Metal ion sensitivity (a), solvent sensitivity (b) and pH sensitivity (c) of LPSi-2 at 20 mg/mL ethanol solution.

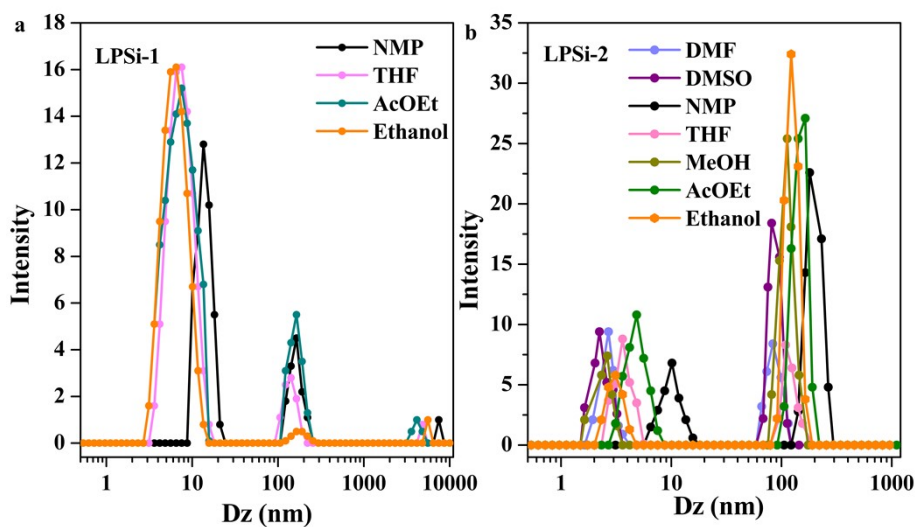

**Fig. S17** The particle size distribution of LPSi-1 and LPSi-2 in different solvents.

#### References

1. Y.B. Feng, H.X. Yan, F. Ding, T. Bai, Y. F. Nie, Y. Zhao, W. X. Feng, B. Z. Tang, *Mater. Chem. Front.*, 2020, **4**, 1375-1382.
